# Supplementary material for: Rat Pharmacokinetics and In Vitro Metabolite Identification of KM-819, a Parkinson’s Disease Candidate, Using LC-MS/MS and LC-HRMS
Source: MDPI journal article supplement (doi:10.3390/molecules29051004), 2024-02-25

Supplementary Materials

# Rat Pharmacokinetics and In Vitro Metabolite Identification of KM-819, a Parkinson's Disease Candidate, Using LC-MS/MS and LC-HRMS

Hae-In Choi <sup>1</sup>, Taeheon Kim <sup>1</sup>, Jin Woo Kim <sup>1</sup>, Gi Ju Lee <sup>1</sup>, Jinyoung Choi <sup>1</sup>, Yoon-Jee Chae <sup>2</sup>, Eunhee Kim <sup>3,4</sup> and Tae-Sung Koo <sup>1,\*</sup>

<sup>1</sup> Graduate School of New Drug Discovery and Development, Chungnam National University, Daejeon 34134, Republic of Korea; chi705@naver.com (H.-I.C.); thkim150@daewoong.co.kr (T.K.); dpslzk333@naver.com (J.W.K.); dlrlwn1234@naver.com (G.J.L.); jinyoung724@naver.com (J.C.)

<sup>2</sup> College of Pharmacy, Woosuk University, Wanju 55338, Republic of Korea; yjchae@woosuk.ac.kr

<sup>3</sup> College of Biological Sciences and Biotechnology, Chungnam National University, Daejeon 34134, Republic of Korea; eunhee@cnu.ac.kr

<sup>4</sup> Biopharmaceutical Division, Kainos Medicine Inc., Seongnam 13488, Republic of Korea

\* Correspondence: kootae@cnu.ac.kr; Tel.: +82-42-821-8628

## Supplementary Figure S1. (a) MS/MS spectra of KM-819 and (b) putative fragmentation pathways of KM-819

KM-819-STD #9643 RT: 11.60 AV: 1 NL: 1.22E7

F: FTMS + p ESI d Full ms2 460.0327@hcd20.00 [50.0000-485.0000]

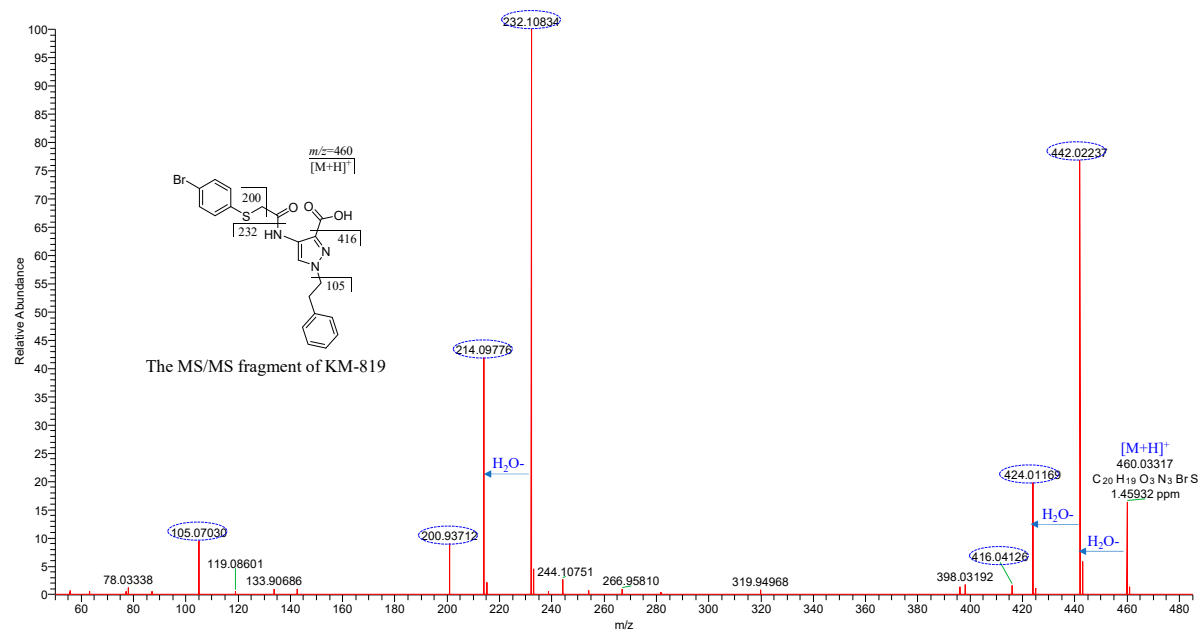

(a)

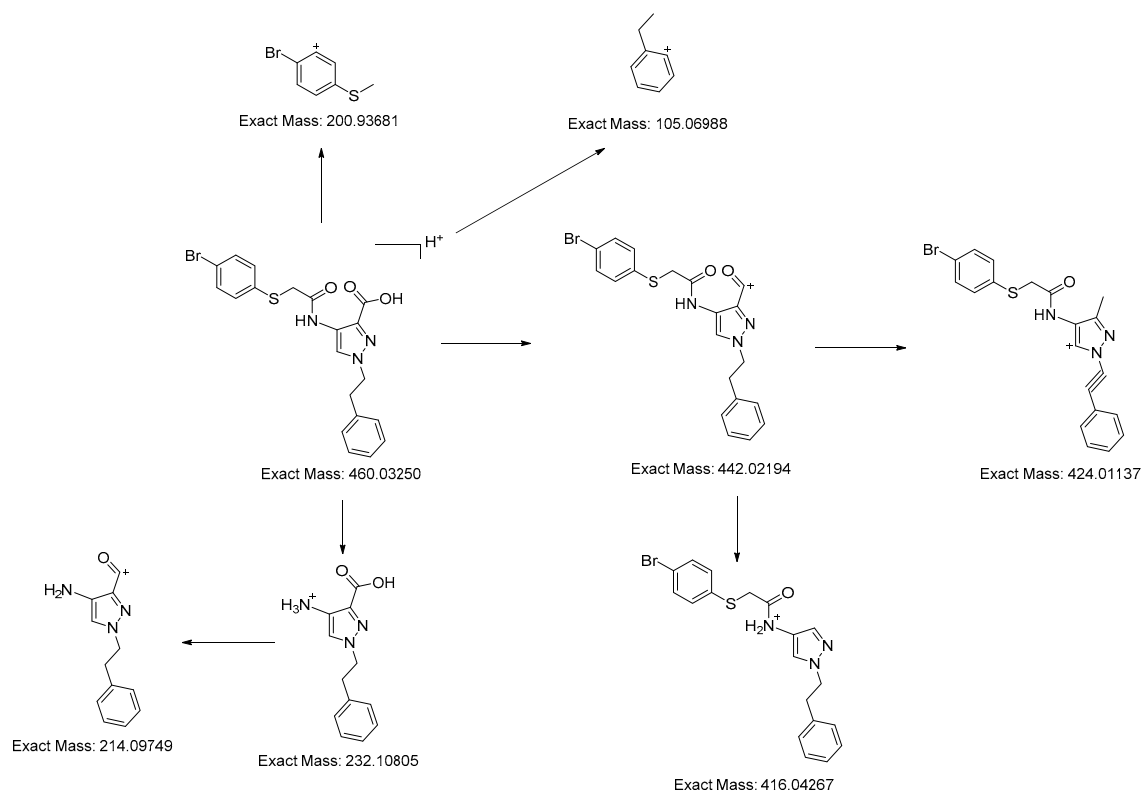

(b)

## Supplementary Figure S2. MS/MS spectra of M1, the de-alkylation metabolite of KM-819, and structure elucidation

KM-819-HHEP-T30 #5700 RT: 6.61 AV: 1 NL: 4.51E5

F: FTMS + p ESI d Full ms2 232.1083@hcd20.00 [50.0000-255.0000]

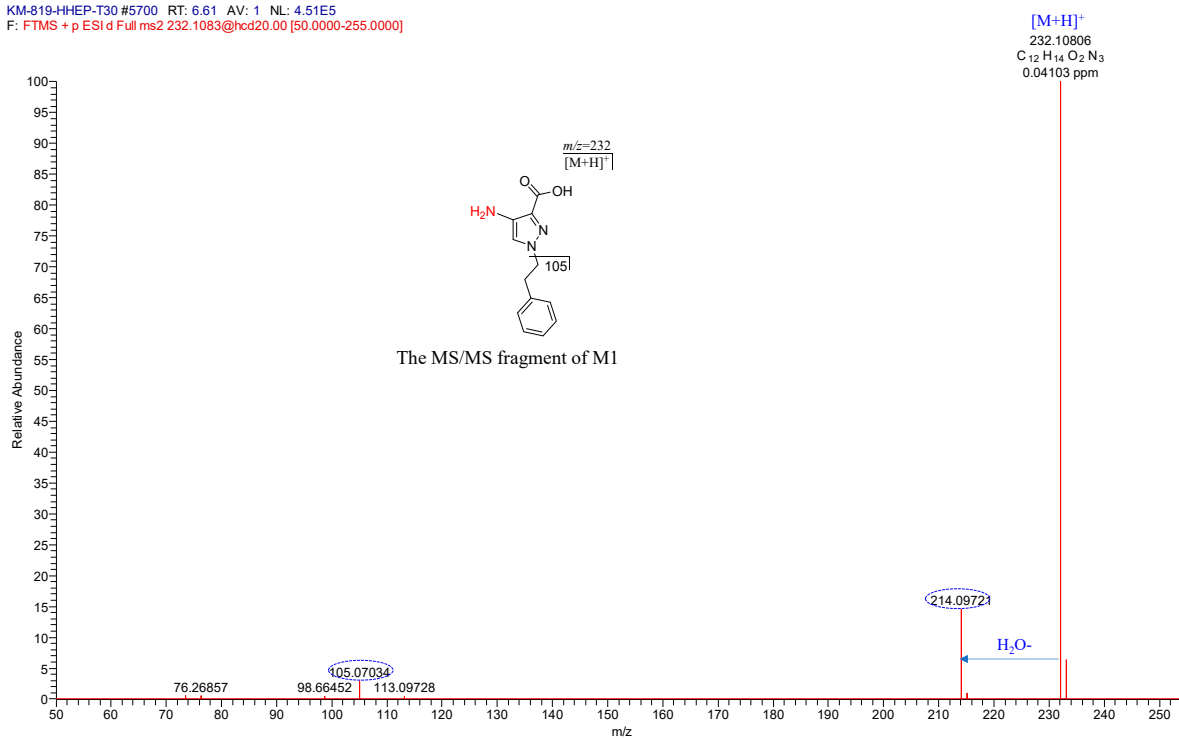

## Supplementary Figure S3. MS/MS spectra of M2, the De-alkylated and methylated metabolite of KM-819, and structure elucidation

KM-819-DHEP-T30 #7540 RT: 7.59 AV: 1 NL: 7.16E5

F: FTMS + p ESI d Full ms2 246.0216@hcd20.00 [50.0000-270.0000]

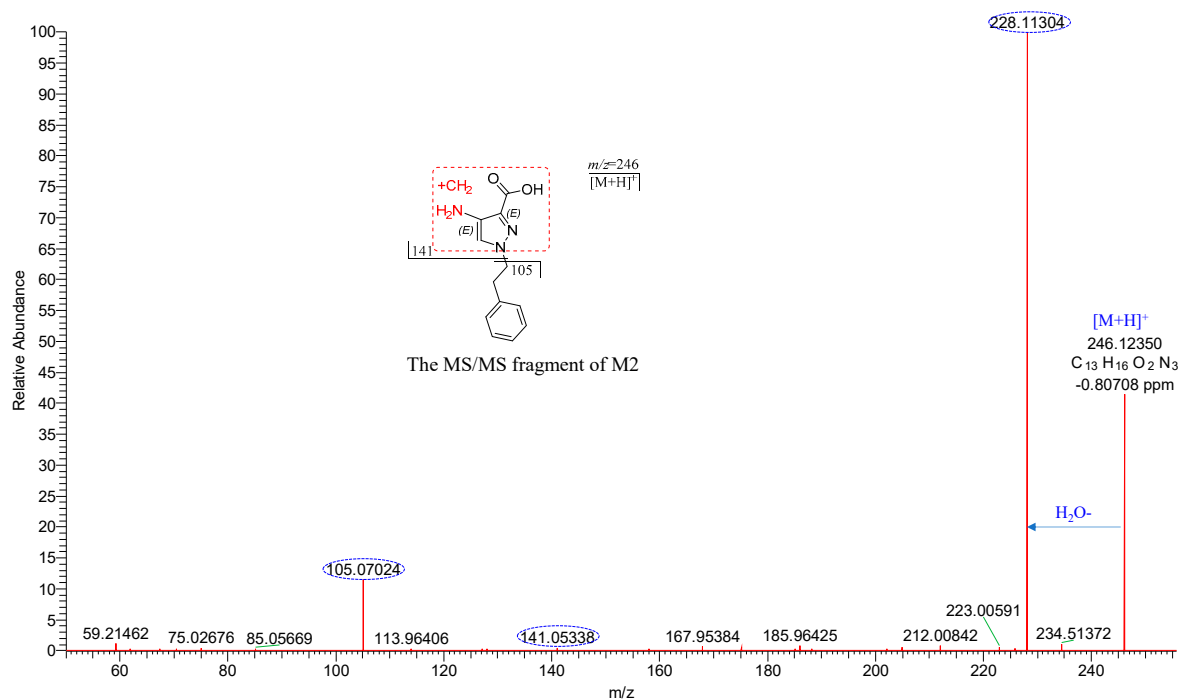

**Supplementary Figure S4.** MS/MS spectra of (a) M3-1, (b) M3-2, (c) M3-3, (d) M3-4, (e) M3-5, the mono-oxidation metabolite of KM-819, and structure elucidation

KM-819-HHEP-T30 #7249 RT: 8.47 AV: 1 NL: 2.45E5  
F: FTMS + p ESI d Full ms2 476.0276@hcd20.00 [50.0000-505.0000]

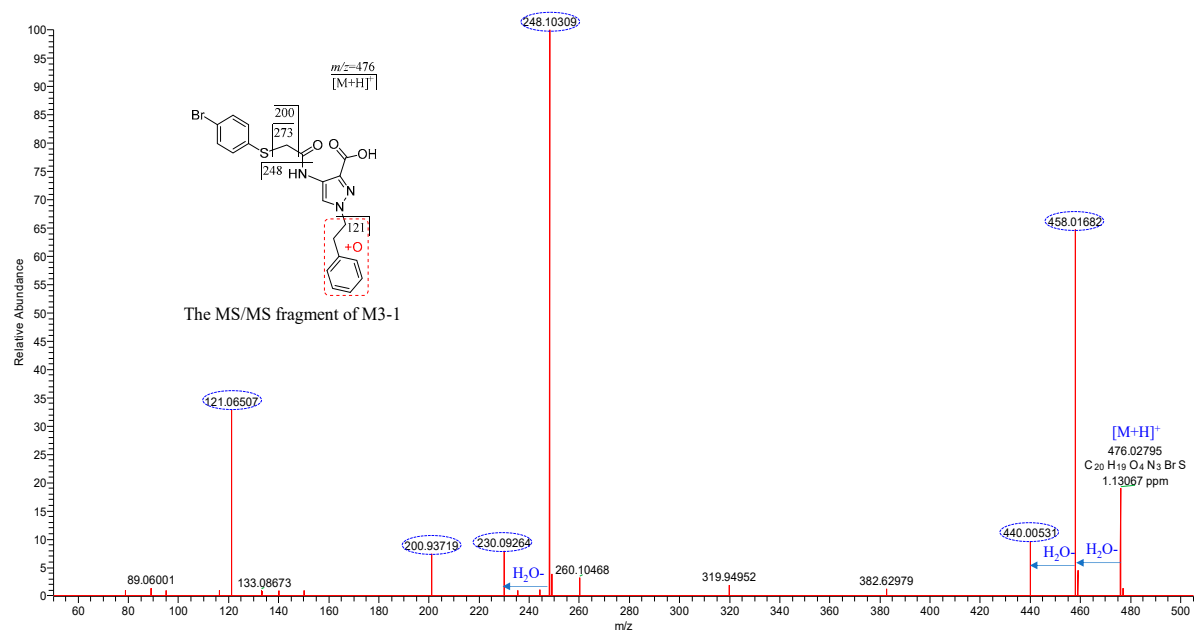

(a)

KM-819-HHEP-T30 #7900 RT: 9.22 AV: 1 NL: 1.45E5  
F: FTMS + p ESI d Full ms2 476.0276@hcd20.00 [50.0000-505.0000]

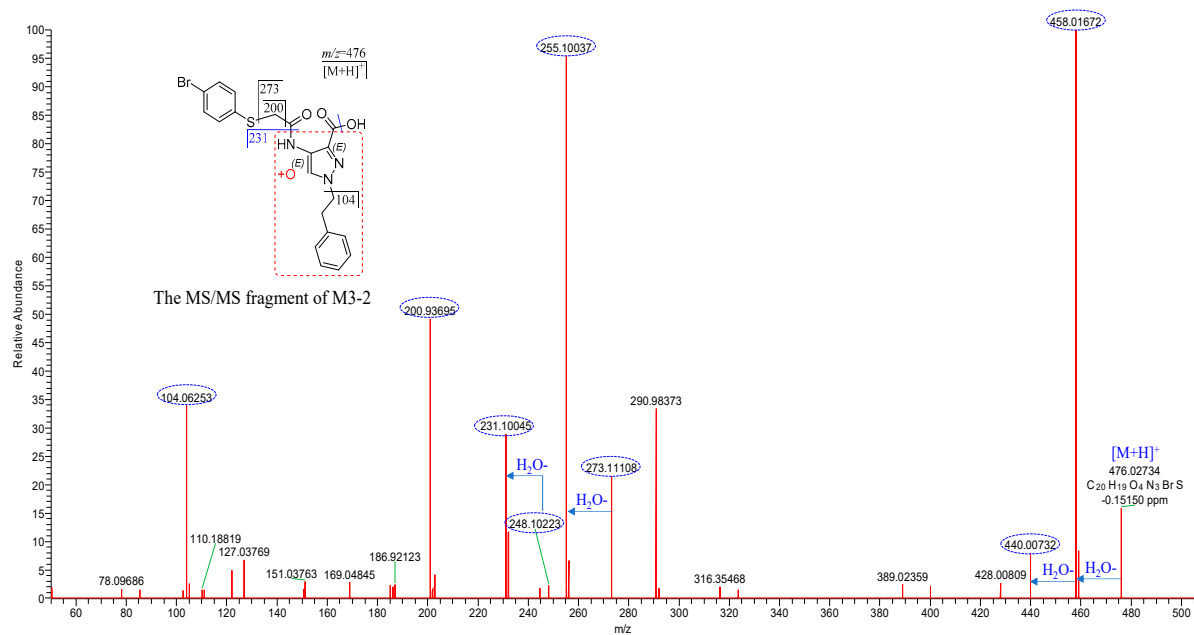

(b)

KM-819-HHEP-T30 #7968 RT: 9.30 AV: 1 NL: 2.03E5  
F: FTMS + p ESId Full ms2 476.0276@hcd20.00 [50.0000-505.0000]

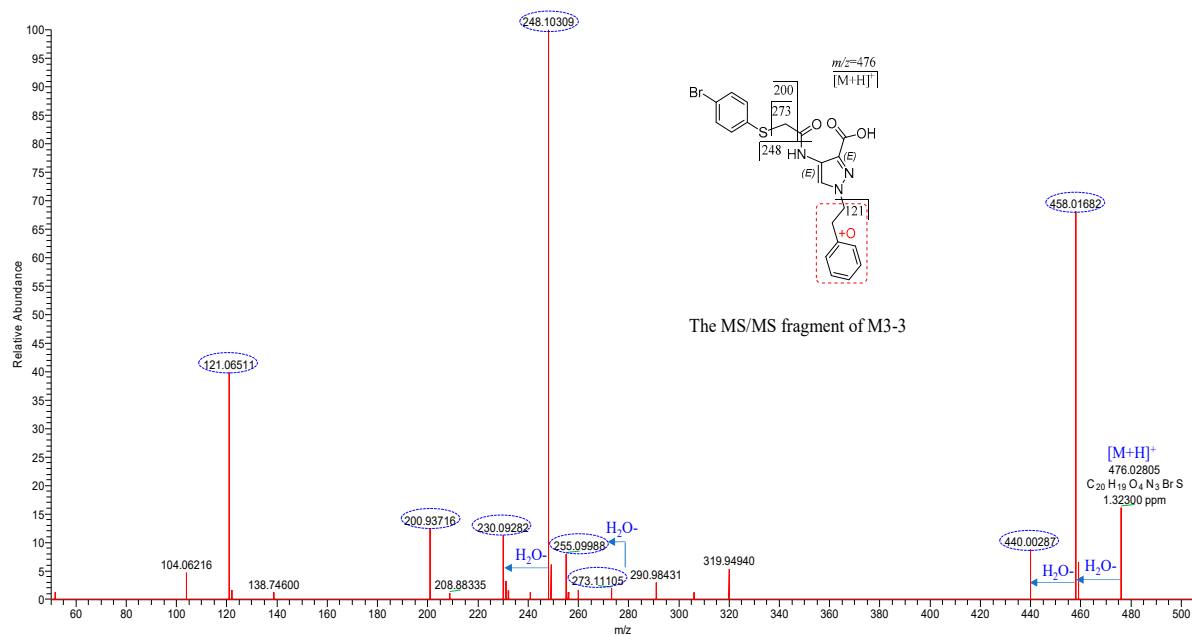

(c)

KM-819-HHEP-T30 #8186 RT: 9.56 AV: 1 NL: 2.24E5  
F: FTMS + p ESId Full ms2 476.0276@hcd20.00 [50.0000-505.0000]

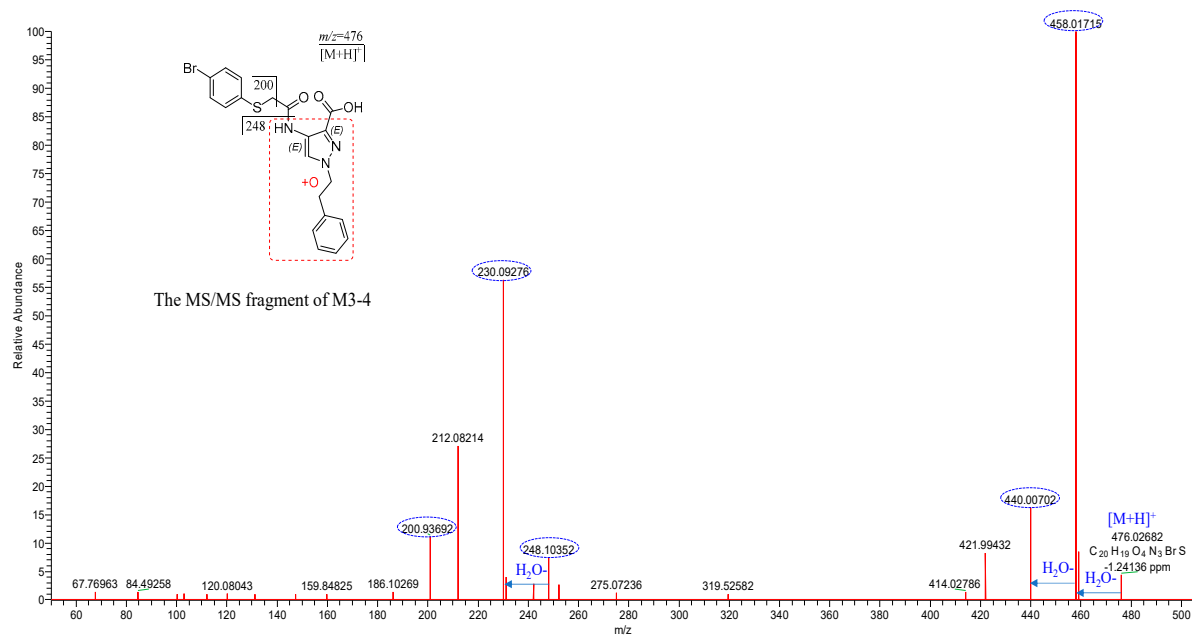

(d)

KM-819-HHEP-T30 #8602 RT: 10.05 AV: 1 NL: 1.38E5  
F: FTMS + p ESI d Full ms2 476.0276@hcd20.00 [50.0000-505.0000]

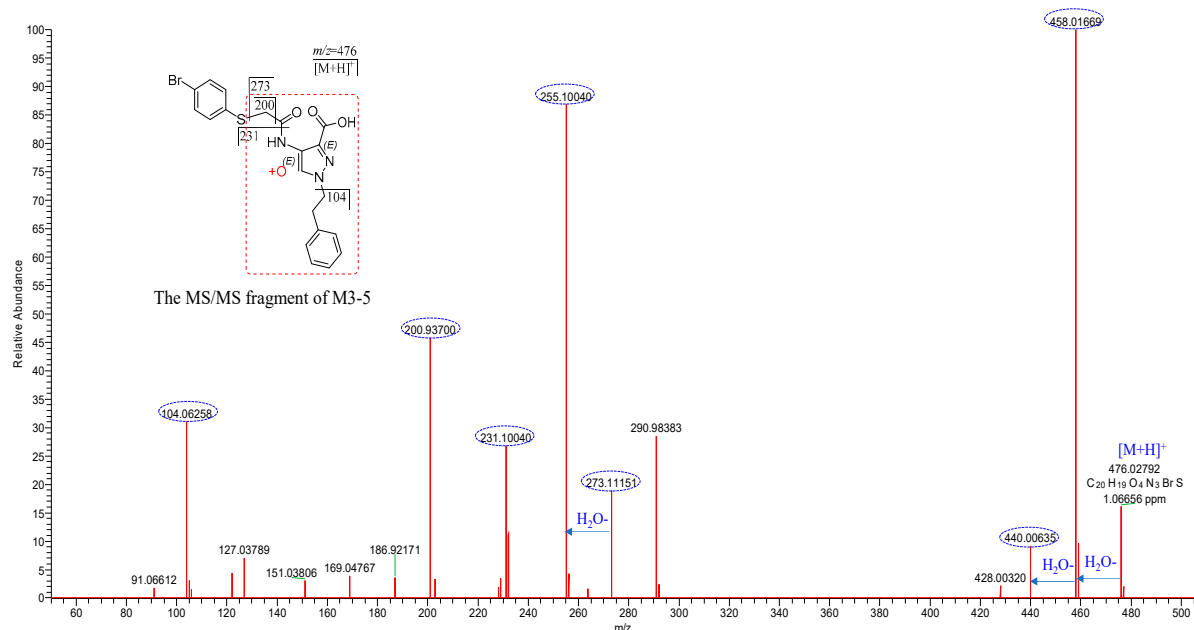

(e)

**Supplementary Figure S5.** MS/MS spectra of (a) M4-1, (b) M4-2, the glucuronidation metabolite of KM-819, and structure elucidation

KM-819-RHEP-T30-IHCD #8845 RT: 10.38 AV: 1 NL: 1.33E5  
F: FTMS + p ESI d Full ms2 636.0650@hcd15.00 [50.0000-665.0000]

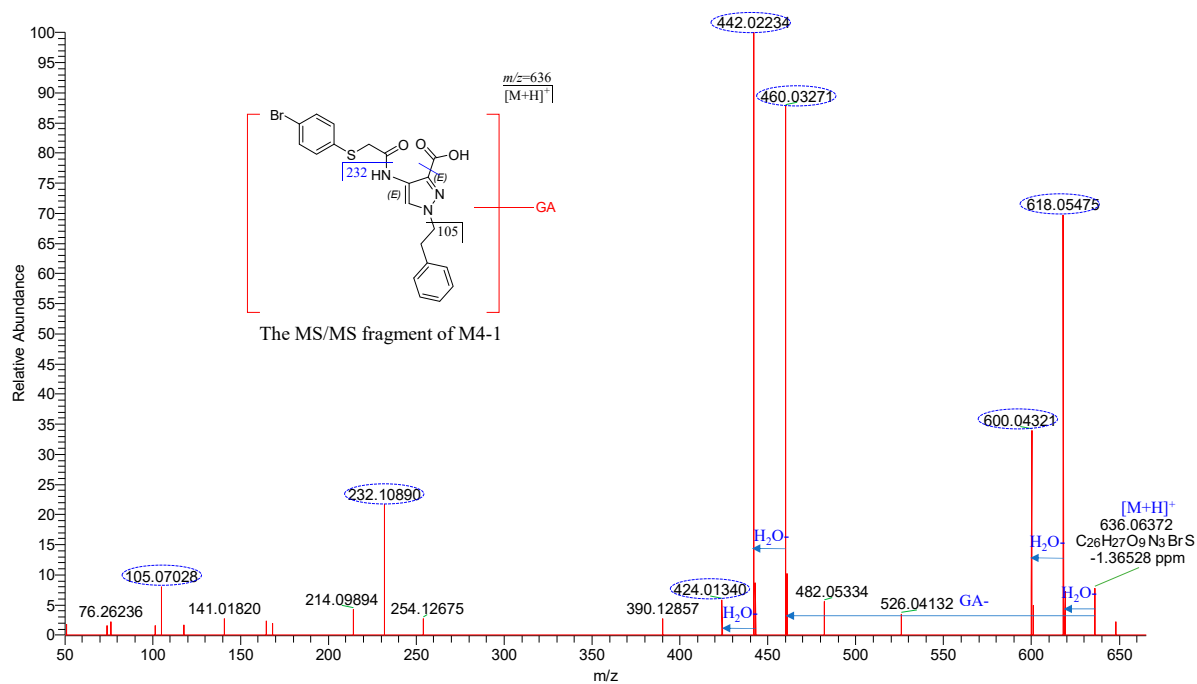

(a)

KM-819-DHEP-T30-IHCD #10168 RT: 10.54 AV: 1 NL: 3.65E5  
 F: FTMS + p ESI d Full ms2 636.0640@hcd15.00 [50.0000-665.0000]

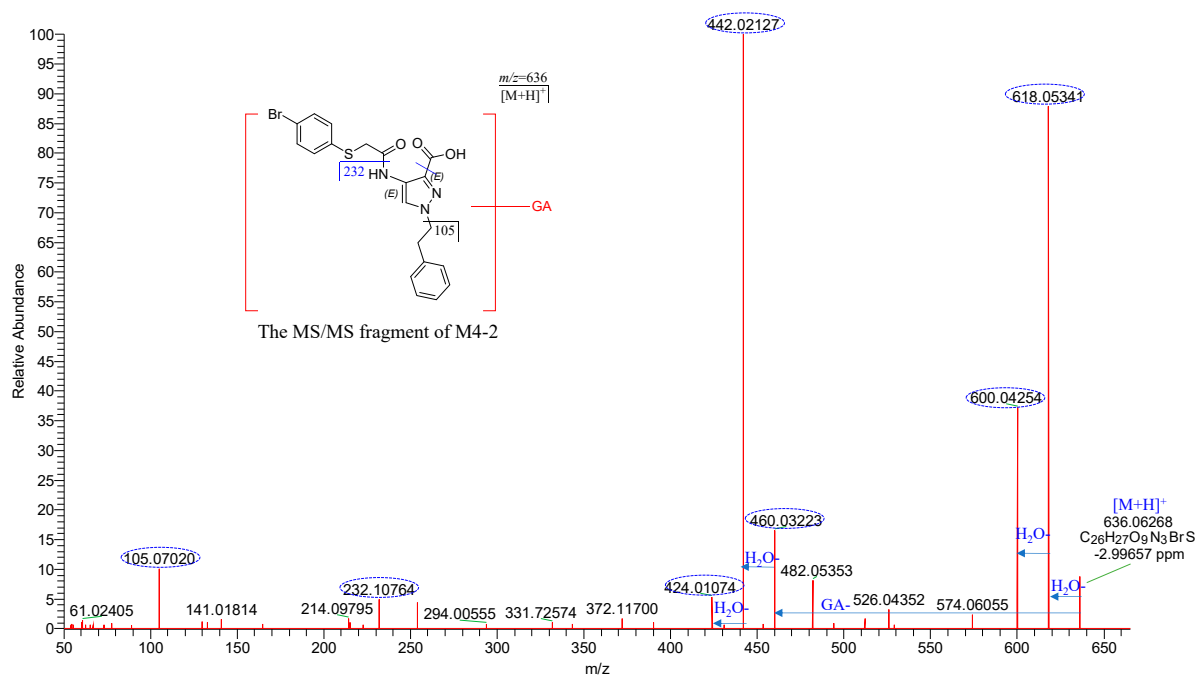

(b)

Supplementary Figure S6. MS/MS spectra of M5, the di-oxidation metabolite of KM-819, and structure elucidation

KM-819-RHEP-T30 #9134 RT: 10.75 AV: 1 NL: 3.52E5  
 F: FTMS + p ESI d Full ms2 492.0228@hcd20.00 [50.0000-520.0000]

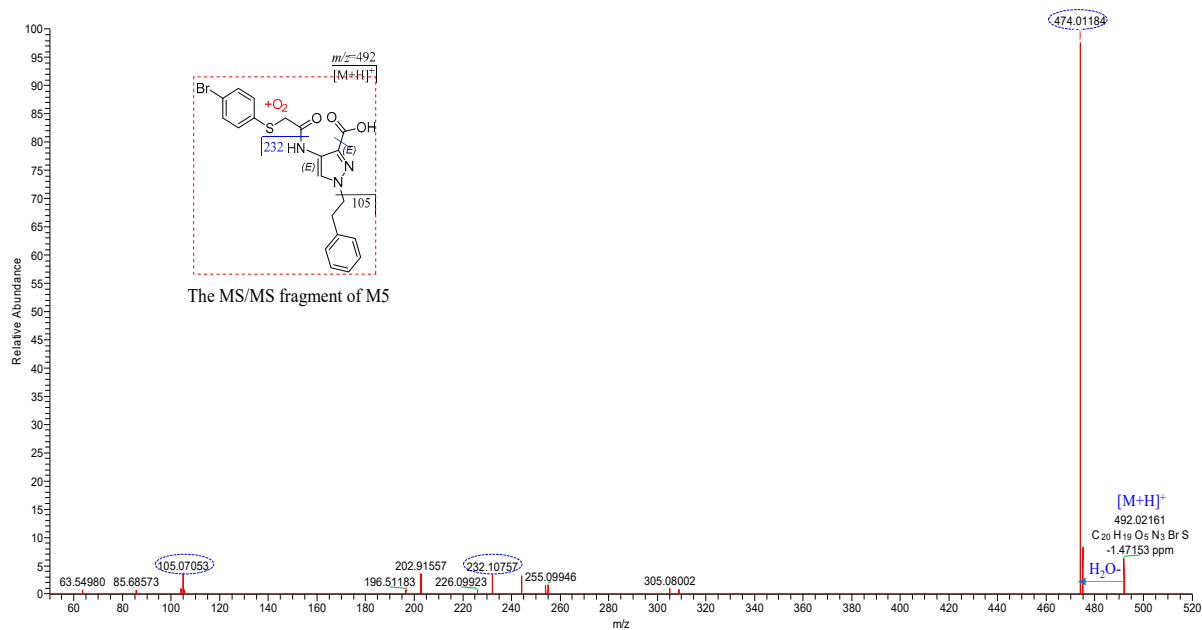

Supplement: s1 [file s1]
